# Supplementary material for: Mesothelial-to-Mesenchymal Transition Contributes to the Generation of Carcinoma-Associated Fibroblasts in Locally Advanced Primary Colorectal Carcinomas
Source: PubMed Central journal article supplement (PMC7072259; doi:10.3390/cancers12020499), 2020-02-21
Supplement: cancers-12-00499-s001.pdf [file cancers-12-00499-s001.pdf]

Communication

# Mesothelial-to-Mesenchymal Transition Contributes to the Generation of Carcinoma-Associated Fibroblasts in Locally Advanced Primary Colorectal Carcinomas

Carlos H. Gordillo <sup>1,†</sup>, Pilar Sandoval <sup>2,†</sup>, Patricia Muñoz-Hernández <sup>1</sup>, Lucía Pascual-Antón <sup>2</sup>, Manuel López-Cabrera <sup>2,\*</sup> and José A. Jiménez-Heffernan <sup>1,\*</sup>

Supplementary Material

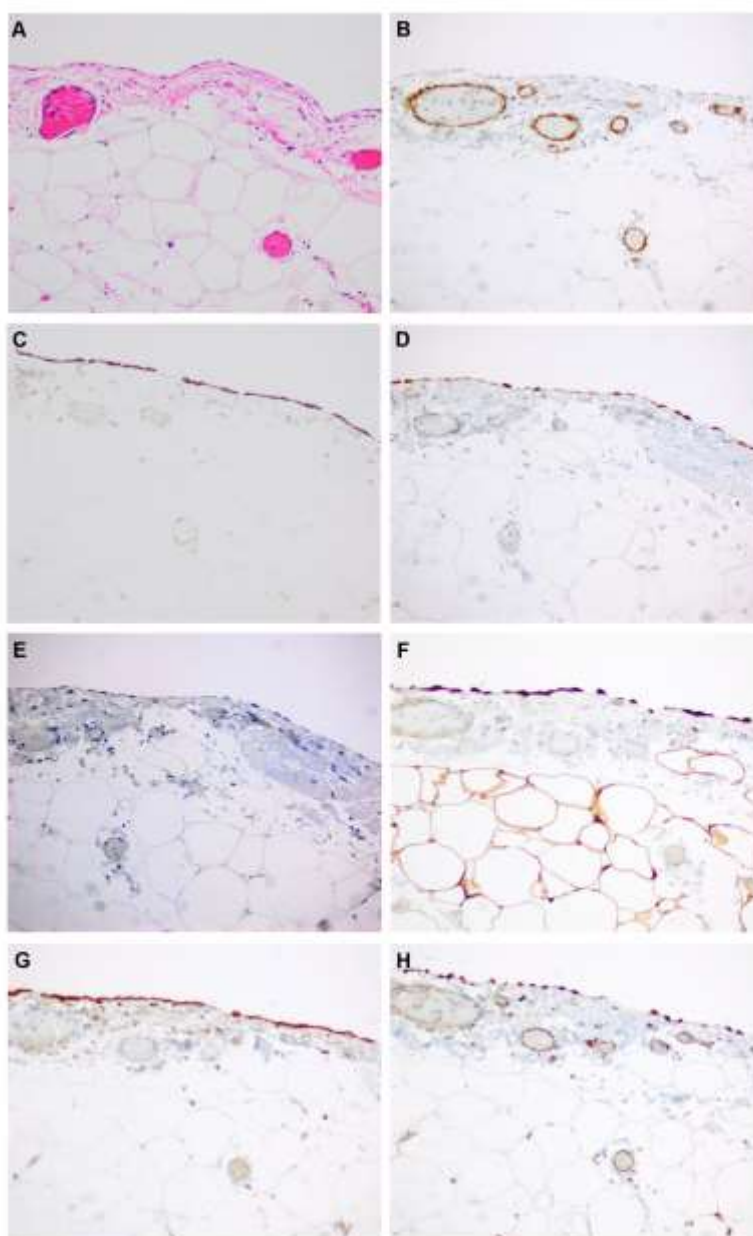

Figure 1. Control visceral peritoneum.
